# Supplementary material
Source: MDPI journal article supplement (https://www.mdpi.com/2304-6740/11/5/222)
Supplement: s1 [file s1 › inorganics-2416194-supplementary.pdf]

# Synthesis, X-ray Structure of Two Hexa-Coordinated Ni(II) Complexes with *s*-Triazine Hydrazine Schiff Base Ligand

**Eman M. Fathalla<sup>1\*</sup>, Morsy A. M. Abu-Youssef<sup>1\*</sup>, Mona M. Sharaf<sup>2</sup>, Ayman El-Faham<sup>1</sup>, Assem Barakat<sup>3</sup>, Matti Haukka<sup>4</sup>, Saied M. Soliman<sup>1\*</sup>**

<sup>1</sup>Department of Chemistry, Faculty of Science, Alexandria University, P.O. Box 426, Ibrahimia, Alexandria 21321, Egypt

<sup>2</sup>Protein Research Department, Genetic Engineering and Biotechnology Research Institute, City of Scientific Research and Technological Applications, Alexandria, P.O. Box 21933, Egypt

<sup>3</sup>Department of Chemistry, College of Science, King Saud University, P. O. Box 2455, Riyadh 11451, Saudi Arabia

<sup>4</sup> Department of Chemistry, University of Jyväskylä, P.O. Box 35, FI-40014 Jyväskylä, Finland

\*Correspondence: eman.nomeir@alexu.edu.eg (E.M.F.); morsy5@alexu.edu.eg (M.A.M.A.-Y.); saied1soliman@yahoo.com or saeed.soliman@alexu.edu.eg (S.M.S.)

## X-Ray structure determinations

The crystals of **1** and **2** were immersed in cryo-oil, mounted in a loop, and measured at a temperature of 170 K. The X-ray diffraction data were collected on a Bruker Kappa Apex II (**1**) or Rigaku Oxford Diffraction Supernova (**2**) diffractometer using Mo K $\alpha$  radiation. The *Denzo-Scalepack* [49] or *CrysAlisPro* [50] software packages were used for cell refinements and data reductions. The structures were solved by the intrinsic phasing method using the *SHELXT* [51] software. A semi-empirical absorption correction based on equivalent reflections (*SADABS* [52]) was applied to the intensities before the structure solution. Structural refinements were carried out using *SHELXL* [53] software with *SHELXLE* [54] graphical user interface. The NH and H<sub>2</sub>O hydrogen atoms were located from the difference Fourier map and refined isotropically. All other hydrogen atoms were positioned geometrically and constrained to ride on their parent atoms, with C-H = 0.95 -0.99 Å and Uiso = 1.2-1.5·Ueq (parent atom). The crystallographic details are summarized in Table S1.

**Table S1.** Crystal Data.

|                                            | <b>1</b>                                                              | <b>2</b>                                                              |
|--------------------------------------------|-----------------------------------------------------------------------|-----------------------------------------------------------------------|
| CCDC no.                                   | 2261660                                                               | 2261659                                                               |
| empirical formula                          | C <sub>18</sub> H <sub>36</sub> N <sub>10</sub> Ni<br>O <sub>14</sub> | C <sub>18</sub> H <sub>32</sub> N <sub>10</sub> Ni<br>O <sub>12</sub> |
| fw                                         | 675.28                                                                | 639.24                                                                |
| temp (K)                                   | 170(2)                                                                | 170(2)                                                                |
| $\lambda$ (Å)                              | 0.71073                                                               | 0.71073                                                               |
| cryst syst                                 | Monoclinic                                                            | Triclinic                                                             |
| space group                                | $P2_1/n$                                                              | $P \bar{1}$                                                           |
| $a$ (Å)                                    | 11.4900(2)                                                            | 8.3135(2)                                                             |
| $b$ (Å)                                    | 17.6794(3)                                                            | 10.9175(2)                                                            |
| $c$ (Å)                                    | 14.1294(2)                                                            | 15.7611(4)                                                            |
| $\alpha$ (deg)                             | 90                                                                    | 71.119(1)                                                             |
| $\beta$ (deg)                              | 90.110(1)                                                             | 80.188(1)                                                             |
| $\gamma$ (deg)                             | 90                                                                    | 84.258(1)                                                             |
| $V$ (Å <sup>3</sup> )                      | 2870.19(8)                                                            | 1332.20(5)                                                            |
| Z                                          | 4                                                                     | 2                                                                     |
| $\rho_{\text{calc}}$ (Mg/m <sup>3</sup> )  | 1.563                                                                 | 1.594                                                                 |
| $\mu$ (Mo K $\alpha$ ) (mm <sup>-1</sup> ) | 0.760                                                                 | 0.808                                                                 |
| No. reflns.                                | 78229                                                                 | 23437                                                                 |
| Completeness to theta = 25.242°            | 98.3 %                                                                | 99.7 %                                                                |

|                               |        |        |
|-------------------------------|--------|--------|
| Unique reflns.                | 7931   | 7434   |
| GOOF ( $F^2$ )                | 1.091  | 1.088  |
| $R_{int}$                     | 0.0398 | 0.0343 |
| $R_1^a$ ( $I \geq 2\sigma$ )  | 0.0342 | 0.0469 |
| $wR_2^b$ ( $I \geq 2\sigma$ ) | 0.0732 | 0.0886 |

---


$$^a R_1 = \Sigma ||F_o| - |F_c|| / \Sigma |F_o|. \quad ^b wR_2 = [\Sigma [w(F_o^2 - F_c^2)^2] / \Sigma [w(F_o^2)^2]]^{1/2}.$$

## Evaluation of antimicrobial activity [56]

### *a) Tested pathogenic microbes*

The antimicrobial activity of the ligand (**DMPT**) and complexes **1-2** was evaluated against two Gram positive bacteria ((*S. aureus* (ATCC 25923) and *B. subtilis* (RCMB015(1)NRR LB-543)), two Gram negative bacteria ((*E. coli* (ATCC 25922) and *P. vulgaris* (RCMB 004(1)ATCC 13315)) and two fungi ((*A. fumigatus* (RCMB 002008) and *C. albicans* (RCMB 005003(1) ATCC 10231)). Gentamycin was used as standard antibacterial agent. The samples maintained in Brain heart infusion (BHI) at 20°C; 300 mL of each stock–culture was added to 3 mL of BHI broth. Overnight cultures were kept for 24 h at 37 °C ± 1°C and the purity of cultures was checked after 24 h of incubation. After 24 h of incubation, bacterial suspension was diluted with sterile physiological solution, for the diffusion and indirect bioautographic tests, to 108 CFU/mL (turbidity = McFarland barium sulfate standard 0.5). In case of fungi *A. fumigatus* (RCMB 002008) and *C. albicans* (RCMB 005003(1) ATCC 10231), the used medium in antagonistic activity against tested fungi is Potato Dextrose Agar, where Ketoconazole was used standard antifungal agent.

### *b) Agar well diffusion method*

Synthetic compound was prepared at concentration 10 mg/mL dissolved in DMSO as stock solutions. Preparation of sterilized Mueller Hinton agar plates seeded with tested pathogenic bacteria occurred. The wells are done by sterilized cork borer in size 6 mm and hence 100 µL of the synthetic compound was poured in each well comparably with DMSO as control. The plates were incubated at 37 °C for 24-48 h (for bacteria) and at 28 °C for 48 h (for fungi). After incubation period; antimicrobial activity was determined by inhibition zones.

### *C) Minimum Inhibitory Concentration (MIC)*

Different dilutions of the compound are inoculated with tested pathogenic microbes. After incubation period of 96 well microplate, the results are measured using microplate reader. To determine at what level the MIC endpoint is established; subculture of test samples at different concentrations occurred in nutrient agar plates.

## References

- [49] Otwinowski, Z.; Minor, W. Processing of X-ray Diffraction Data Collected in Oscillation Mode. *Methods in Enzymology*, **1997**, 276, 307-326.
- [50] Rigaku Oxford Diffraction, *CrysAlisPro*, Agilent Technologies inc., 2020, Yarnton, Oxfordshire, England.
- [51] Sheldrick, G.M. Shelxt-integrated space-group and crystal-structure determination. *Acta Cryst.* **2015**, A71, 3-8.
- [52] Sheldrick, G. M. *SADABS - Bruker Nonius scaling and absorption correction* -, Bruker AXS, Inc.: Madison, Wisconsin, USA, 2012.
- [53] Sheldrick, G. M. Crystal structure refinement with SHELXL. *Acta Cryst.* **2015**, C71, 3-8.
- [54] Hübschle, C.B.; Sheldrick, G.M.; Dittrich, B. *ShelXle*: A Qt graphical user interface for SHELXL. *J. Appl. Crystallogr.* **2011**, 44, 1281–1284.
- [56] Lu, P.-L.; Liu, Y.-C.; Toh, H.-S.; Lee, Y.-L.; Liu, Y.-M.; Ho, C.-M.; Huang, C.-C.; Liu, C.-E.; Ko, W.-C.; Wang, J.-H. *Int. J. Antimicrob. Agents.* **2012**, 40, S37-S43.

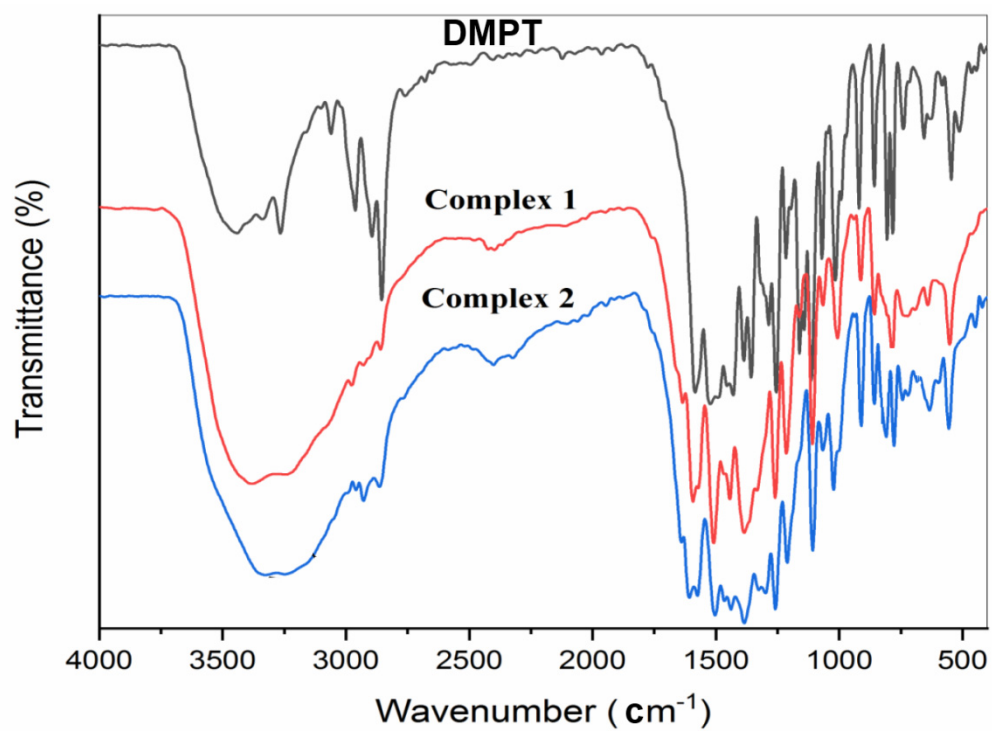

**Figure. S1.** FTIR spectra of complexes **1** and **2** compared to the free ligand **DMPT**.

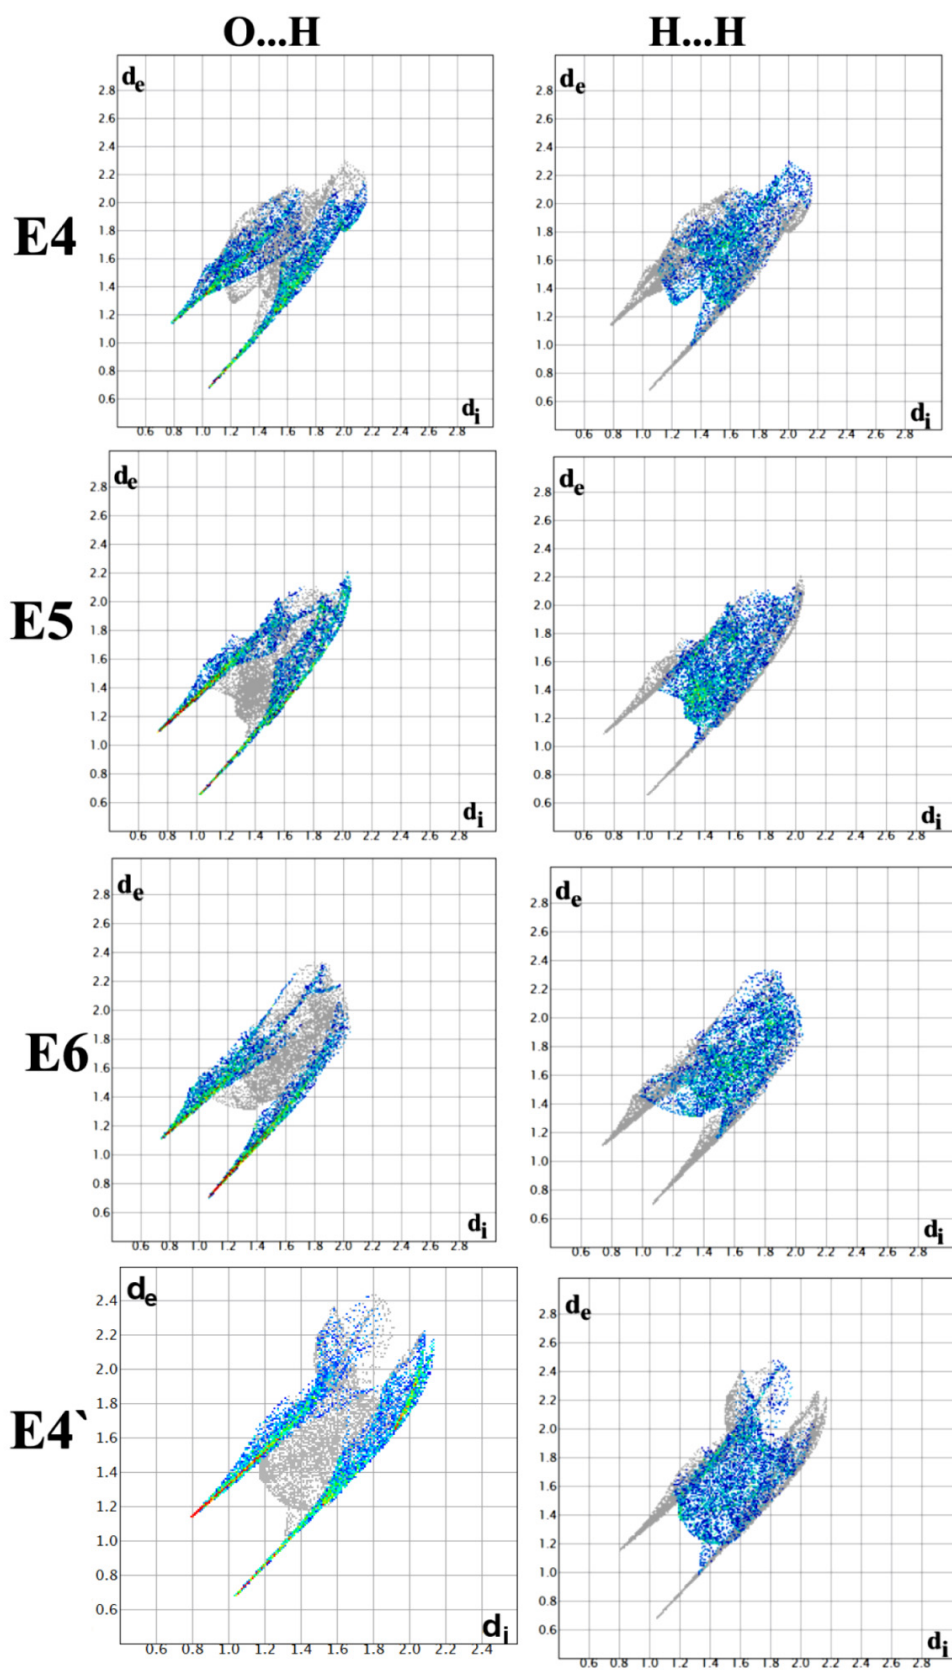

**Figure. S2.** The 2D fingerprint plots of the major contacts around the water moieties (E4, E5, E6 in complex 1 and E4' in complex 2).
